# Supplementary material
Source: Springer Nature journal article supplement (https://www.springermedizin.de/resource/supplementary/12985_2008_377_MOESM2_ESM.pdf/9607946)

A

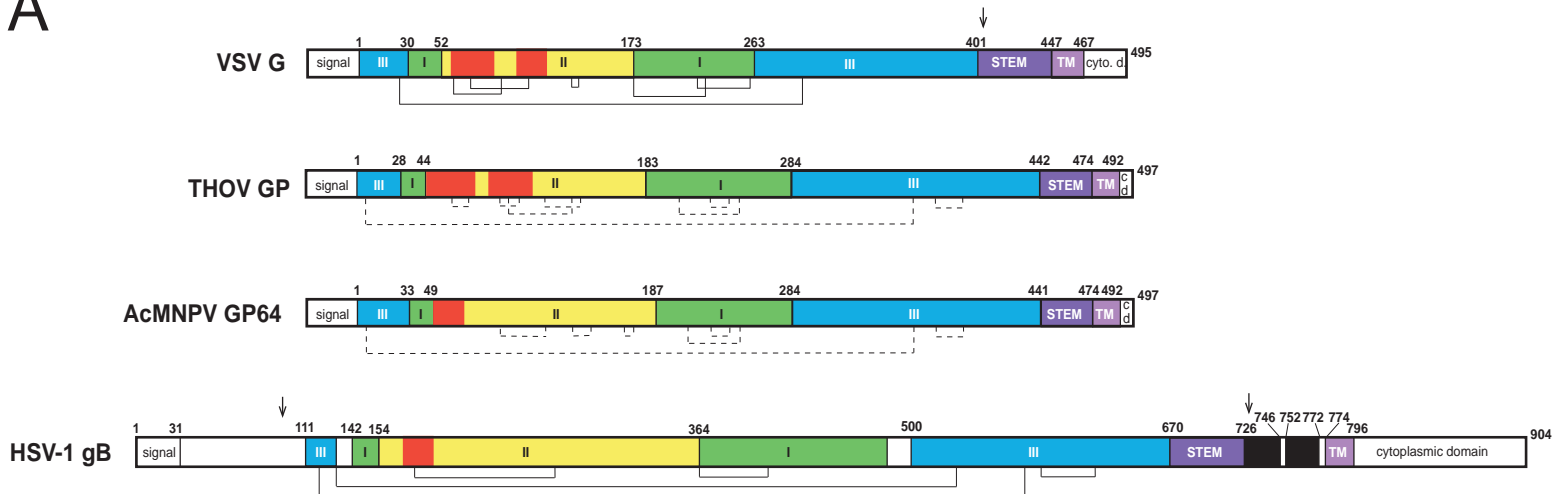

B

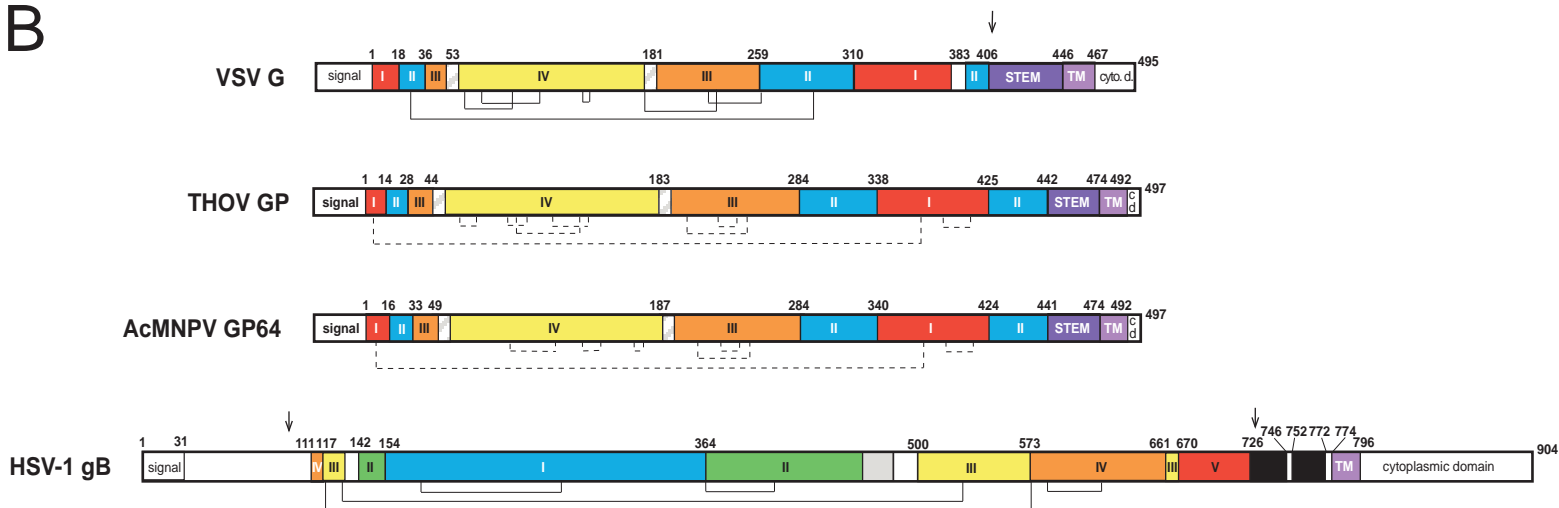

Supplement: MOESM2 [file 9607946]
